# Supplementary material for: EPR Study of KO2 as a Source of Superoxide and •BMPO-OH/OOH Radical That Cleaves Plasmid DNA and Detects Radical Interaction with H2S and Se-Derivatives
Source: Antioxidants (Basel). 2021 Aug 13;10(8):1286. doi: 10.3390/antiox10081286 (PMC8389328; doi:10.3390/antiox10081286)
Supplement: Supplementary file 1 [file antioxidants-10-01286-s001.zip › antioxidants-1293304-supplementary.pdf]

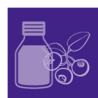

# Supplementary Materials: EPR Study of $\text{KO}_2$ as a Source of Superoxide and $\cdot\text{BMPO-OH/OOH}$ Radical That Cleaves Plasmid DNA and Detects Radical Interaction with $\text{H}_2\text{S}$ and Se-Derivatives

Anton Misak <sup>1</sup>, Vlasta Brezova <sup>2</sup>, Miroslav Chovanec <sup>3</sup>, Karol Luspai <sup>2</sup>, Muhammad Jawad Nasim <sup>4</sup>, Marian Grman <sup>1</sup>, Lenka Tomasova <sup>1</sup>, Claus Jacob <sup>4</sup> and Karol Ondrias <sup>1,\*</sup>

<sup>1</sup> Department of Molecular Physiology, Institute of Clinical and Translational Research, Biomedical Research Center, Slovak Academy of Sciences, Dúbravská cesta 9, 84505 Bratislava, Slovakia; anton.misak@savba.sk (A.M.); marian.grman@savba.sk (M.G.); lenka.tomasova@savba.sk (L.T.)

<sup>2</sup> Institute of Physical Chemistry and Chemical Physics, Faculty of Chemical and Food Technology, Slovak University of Technology in Bratislava, Radlinského 9, 81237 Bratislava, Slovakia; vlasta.brezova@stuba.sk (V.B.); karol.luspai@stuba.sk (K.L.)

<sup>3</sup> Department of Genetics, Cancer Research Institute, Biomedical Research Center, Slovak Academy of Sciences, Dúbravská cesta 9, 84505 Bratislava, Slovakia; miroslav.chovanec@savba.sk

<sup>4</sup> Division of Bioorganic Chemistry, School of Pharmacy, University of Saarland, D-66123 Saarbruecken, Germany; jawad.nasim@uni-saarland.de (M.J.N.); c.jacob@mx.uni-saarland.de (C.J.)

\* Correspondence: karol.ondrias@savba.sk

## Step-by-step information on sample preparation for EPR and pDNA cleavage measurements:

### Procedures for preparation of EPR samples:

All EPR samples were prepared and measured at 37 °C.

#### Procedure 1:

- 1.) Solution A.: (98  $\mu\text{L}$   $\text{H}_2\text{O}$  + 200  $\mu\text{L}$  of 100  $\text{mmol L}^{-1}$  sodium phosphate buffer; 200  $\mu\text{mol L}^{-1}$  DTPA, pH 7.4 + 18  $\mu\text{L}$  of 1  $\text{mol L}^{-1}$  HCl)  $\rightarrow$  pH  $4.9 \pm 0.3$ ;
- 2.) Solution B.: Add 181  $\mu\text{L}$  of Solution A into 0.5 mg of powdered  $\text{KO}_2$ . Mix it for 5 s;
- 3.) Incubate it for 10–13 s;
- 4.) Add 84  $\mu\text{L}$  of (100  $\text{mmol L}^{-1}$  BMPO in  $\text{H}_2\text{O}$ ) into Solution B;  $\rightarrow$  pH  $7.4 \pm 0.3$ .

Final concentrations in the sample: 40  $\text{mmol L}^{-1}$   $\text{KO}_2$ , 20  $\text{mmol L}^{-1}$  BMPO, 50  $\text{mmol L}^{-1}$  sodium phosphate buffer; 100  $\mu\text{mol L}^{-1}$  DTPA, pH 7.4.

#### Procedure 2:

- 1.) Solution A.: 84  $\mu\text{L}$  of 100  $\text{mmol L}^{-1}$  BMPO solution in  $\text{H}_2\text{O}$  + (98  $\mu\text{L}$   $\text{H}_2\text{O}$  + 200  $\mu\text{L}$  of 100  $\text{mmol L}^{-1}$  sodium phosphate buffer; 200  $\mu\text{mol L}^{-1}$  DTPA, pH 7.4 + 18  $\mu\text{L}$  of 1  $\text{mol L}^{-1}$  HCl)  $\rightarrow$  pH  $4.7 \pm 0.3$ ;
- 2.) Solution B.: Add 181  $\mu\text{L}$  of Solution A into 0.5 mg of powdered  $\text{KO}_2$ . Mix it for 5 s;  $\rightarrow$  pH  $7.4 \pm 0.3$ .

Final concentrations were the same as in Procedure 1.

#### Procedure 3:

- 1.) Prepare Solution B as in Procedure 2;
  - 2.) Incubate 138.6  $\mu\text{L}$  of the Solution B for 12 s;
  - 3.) Add 1.4  $\mu\text{L}$  of 10  $\text{mmol L}^{-1}$   $\text{Na}_2\text{S}$  in  $\text{H}_2\text{O}$  or 1.4  $\mu\text{L}$  of 10  $\text{mmol L}^{-1}$  RSe-1/ RSe-2 prepared in the phosphate buffer
- Final concentrations were the same as in Procedure 1, besides 0.1  $\text{mmol L}^{-1}$   $\text{Na}_2\text{S}$ , RSe-1 or RSe-2.

**Procedure 4:**

- 1.) Solution A.: 84  $\mu\text{L}$  of 100  $\text{mmol L}^{-1}$  BMPO in  $\text{H}_2\text{O}$  + (98  $\mu\text{L}$   $\text{H}_2\text{O}$  + 200  $\mu\text{L}$  of 100  $\text{mmol L}^{-1}$  sodium phosphate buffer; 200  $\mu\text{mol L}^{-1}$  DTPA, pH 7.4);
- 2.) Solution B.: Add 181  $\mu\text{L}$  of Solution A into 0.5 mg of powdered  $\text{KO}_2$ .  $\rightarrow$  pH 10-11;
- 3.) Incubate it for 30 s;
- 4.) Add 8  $\mu\text{L}$  of 1  $\text{mol L}^{-1}$  HCl  $\rightarrow$  pH 7.4.

Final concentrations were the same as in Procedure 1.

**Procedures for preparation of samples for pDNA cleavage studies:**

The samples with pDNA were incubated 30 min at 37  $^{\circ}\text{C}$ .

**Procedure 5: Effect of  $\text{KO}_2$  on pDNA alone or in the presence of  $\text{H}_2\text{O}_2$ :**

1. Solution A.: 45  $\text{mmol L}^{-1}$  sodium phosphate buffer, 90  $\mu\text{mol L}^{-1}$  DTPA, pH adjusted with 1  $\text{mol L}^{-1}$  HCl according to required final values (see next step);
2. Solution B.: 420  $\mu\text{L}$  of solution A was added into 0.6 mg of powdered  $\text{KO}_2$   $\rightarrow$  20  $\text{mmol L}^{-1}$   $\text{KO}_2$  in phosphate buffer pH 6.5, 7.4, 8.0 or 8.5 in final;
3. 10 s vortexing;
4. 10  $\mu\text{L}$  of the mixture was added into 10  $\mu\text{L}$  of pDNA (0.2  $\mu\text{g}$ ) in 5  $\text{mmol L}^{-1}$  phosphate buffer, 10  $\mu\text{mol L}^{-1}$  DTPA, corresponding pH  $\rightarrow$  10  $\text{mmol L}^{-1}$   $\text{KO}_2$  in 25  $\text{mmol L}^{-1}$  phosphate buffer, 50  $\mu\text{mol L}^{-1}$  DTPA, pH 6.5, 7.4, 8.0 or 8.5;

In the experiments involving  $\text{H}_2\text{O}_2$ , the solution of pDNA contained  $\text{H}_2\text{O}_2$  (5  $\text{mmol L}^{-1}$  in final).

**Procedure 6: Effect of (BMPO+HCl) +  $\text{KO}_2$  on pDNA assessed at different pH.**

1. Solution A.: 45  $\text{mmol L}^{-1}$  sodium phosphate buffer, 90  $\mu\text{mol L}^{-1}$  DTPA, 10  $\text{mmol L}^{-1}$  BMPO, pH adjusted with 1  $\text{mol L}^{-1}$  HCl according to required final values (see next step);
2. Solution B.: 420  $\mu\text{L}$  of solution A was added into 0.6 mg of powdered  $\text{KO}_2$   $\rightarrow$  20  $\text{mmol L}^{-1}$   $\text{KO}_2$  and 10  $\text{mmol L}^{-1}$  BMPO in phosphate buffer pH 6.5, 7.4, 8.0 or 8.5 in final;
3. 10 s vortexing;
4. 10  $\mu\text{L}$  of the mixture was added into 10  $\mu\text{L}$  of pDNA (0.2  $\mu\text{g}$ ) in 5  $\text{mmol L}^{-1}$  phosphate buffer, 10  $\mu\text{mol L}^{-1}$ , corresponding pH  $\rightarrow$  10  $\text{mmol L}^{-1}$   $\text{KO}_2$  and 5  $\text{mmol L}^{-1}$  BMPO in 25  $\text{mmol L}^{-1}$  phosphate buffer, 50  $\mu\text{mol L}^{-1}$  DTPA, pH 6.5, 7.4, 8.0 or 8.5.

**Procedure 7: Effect of (BMPO+HCl) +  $\text{KO}_2$  on pDNA assessed at pH 7.4.**

1. Solution A.: 45  $\text{mmol L}^{-1}$  sodium phosphate buffer, 90  $\mu\text{mol L}^{-1}$  DTPA, 10  $\text{mmol L}^{-1}$  BMPO, pH adjusted with 1  $\text{mol L}^{-1}$  HCl according to required final values (see next step);
2. Solution B.: 420  $\mu\text{L}$  of solution A was added into 0.6 mg of powdered  $\text{KO}_2$   $\rightarrow$  20  $\text{mmol L}^{-1}$   $\text{KO}_2$  and 10  $\text{mmol L}^{-1}$  BMPO in phosphate buffer pH 6.5, 7.4, 8.0 or 8.5 in final;
3. 10 s vortexing;
4. 5  $\text{mmol L}^{-1}$  phosphate buffer (10  $\mu\text{mol L}^{-1}$  DTPA) containing pDNA (0.2  $\mu\text{g}$ ) was adjusted with 0.5  $\text{mol L}^{-1}$  NaOH (for pH 6.5) or 0.1/0.125  $\text{mol L}^{-1}$  HCl (for pH 8.0/8.5) to standardize pH to final value of 7.4

5. 10  $\mu\text{L}$  of the mixture was added into 10  $\mu\text{L}$  of pDNA (0.2  $\mu\text{g}$ ) in 5  $\text{mmol L}^{-1}$  phosphate buffer, 10  $\mu\text{mol L}^{-1}$ , pH adjusted according to the step 4  $\rightarrow$  10  $\text{mmol L}^{-1}$   $\text{KO}_2$  and 5  $\text{mmol L}^{-1}$  BMPO in 25  $\text{mmol L}^{-1}$  phosphate buffer, 50  $\mu\text{mol L}^{-1}$  DTPA, pH 7.4.

**Procedure 8: Effects of [(buffer+HCl) +  $\text{KO}_2$ ] + BMPO on pDNA.**

1. Solution A.: 50  $\text{mmol L}^{-1}$  sodium phosphate buffer, 100  $\mu\text{mol L}^{-1}$  DTPA, pH adjusted with 1  $\text{mol L}^{-1}$  HCl according to required final values (see next step);
2. Solution B.: 378  $\mu\text{L}$  of solution A was added into 0.6 mg of powdered  $\text{KO}_2 \rightarrow$  22  $\text{mmol L}^{-1}$   $\text{KO}_2$  in 50  $\text{mmol L}^{-1}$  phosphate buffer, 100  $\mu\text{mol L}^{-1}$  DTPA, ~ pH 6.5, 7.4, 8.0 or 8.5;
3. 10 s vortexing;
4. 42  $\mu\text{L}$  of 100  $\text{mmol L}^{-1}$  BMPO was added into  $\text{KO}_2$  solution (solution B)  $\rightarrow$  20  $\text{mmol L}^{-1}$   $\text{KO}_2$  and 10  $\text{mmol L}^{-1}$  BMPO in 45  $\text{mmol L}^{-1}$  phosphate buffer, 90  $\mu\text{mol L}^{-1}$  DTPA, pH 6.5, 7.4, 8.0 or 8.5;
5. 10 s vortexing;
6. 10  $\mu\text{L}$  of the mixture was added into 10  $\mu\text{L}$  of pDNA (0.2  $\mu\text{g}$ ) in 5  $\text{mmol L}^{-1}$  phosphate buffer, 10  $\mu\text{mol L}^{-1}$ , corresponding pH  $\rightarrow$  10  $\text{mmol L}^{-1}$   $\text{KO}_2$  and 5  $\text{mmol L}^{-1}$  BMPO in 25  $\text{mmol L}^{-1}$  phosphate buffer, 50  $\mu\text{mol L}^{-1}$  DTPA, pH 6.5, 7.4, 8.0 or 8.5;

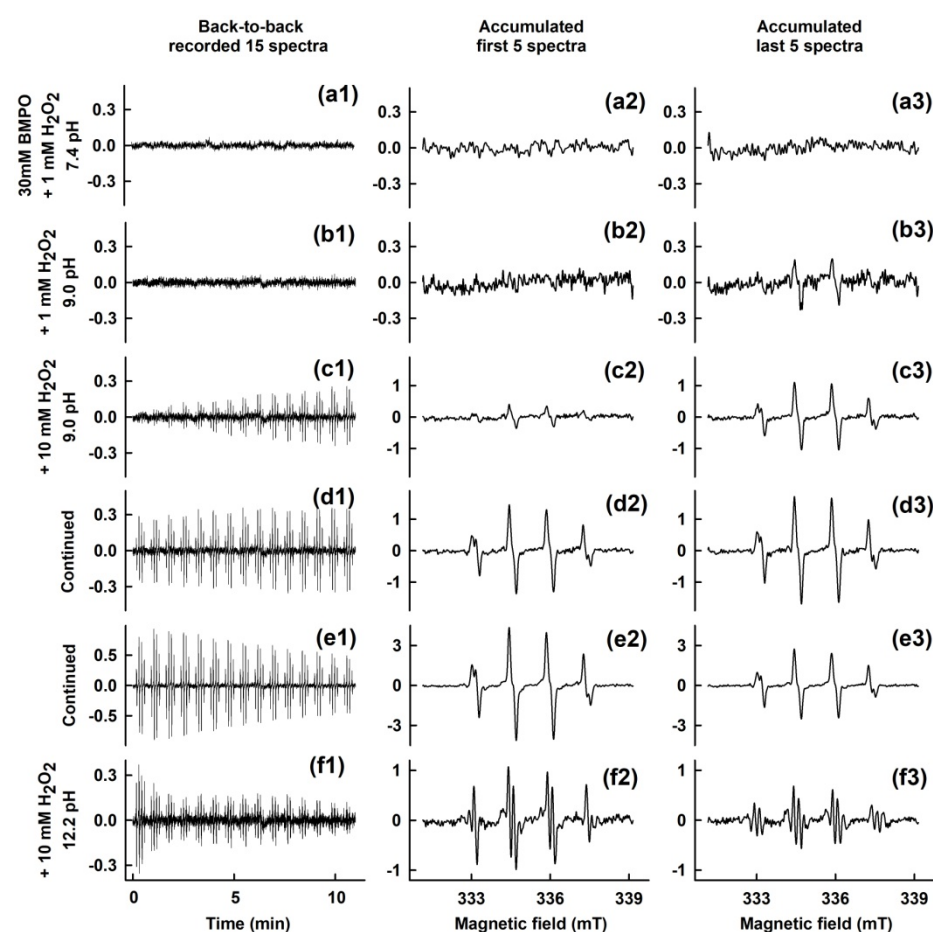

**Figure S1.** Time- and pH- dependent EPR spectra of  $\bullet$ BMPO adducts of the BMPO in the presence of  $\text{H}_2\text{O}_2$ . (column **a1-f1**) Collection of 15 EPR spectra arranged back-to-back of the BMPO-adducts, each 42 s, with starting acquisition  $100 \pm 15$  s after sample preparation; (column **a2-i2**) first to fifth accumulated spectra and (column **a3-i3**) last five accumulated spectra. Buffer: 50 mmol  $\text{L}^{-1}$  sodium phosphate and 100  $\mu\text{mol L}^{-1}$  diethylenetriaminepentaacetic acid (DTPA), pH 7.4 and adjusted by NaOH to 9.0 and 12.2. . EPR spectra of (**a1-a3**) 30 mmol  $\text{L}^{-1}$  BMPO in the presence of 1 mmol  $\text{L}^{-1}$   $\text{H}_2\text{O}_2$  at pH 7.4; (**b1-b3**) 30 mmol  $\text{L}^{-1}$  BMPO in the presence of 1 mmol  $\text{L}^{-1}$   $\text{H}_2\text{O}_2$  at pH 9.0; (**c1-c3**) 30 mmol  $\text{L}^{-1}$  BMPO in the presence of 10 mmol  $\text{L}^{-1}$   $\text{H}_2\text{O}_2$  at pH 9.0 and continued measurements (**d1-d3**) and (**e1-e3**); (**f1-f3**) 30 mmol  $\text{L}^{-1}$  BMPO in the presence of 10 mmol  $\text{L}^{-1}$   $\text{H}_2\text{O}_2$  at pH 12.2 EPR spectra were measured as described in (Misak et al. Antioxidants 2020, 9, 918; doi:10.3390/antiox9100918).

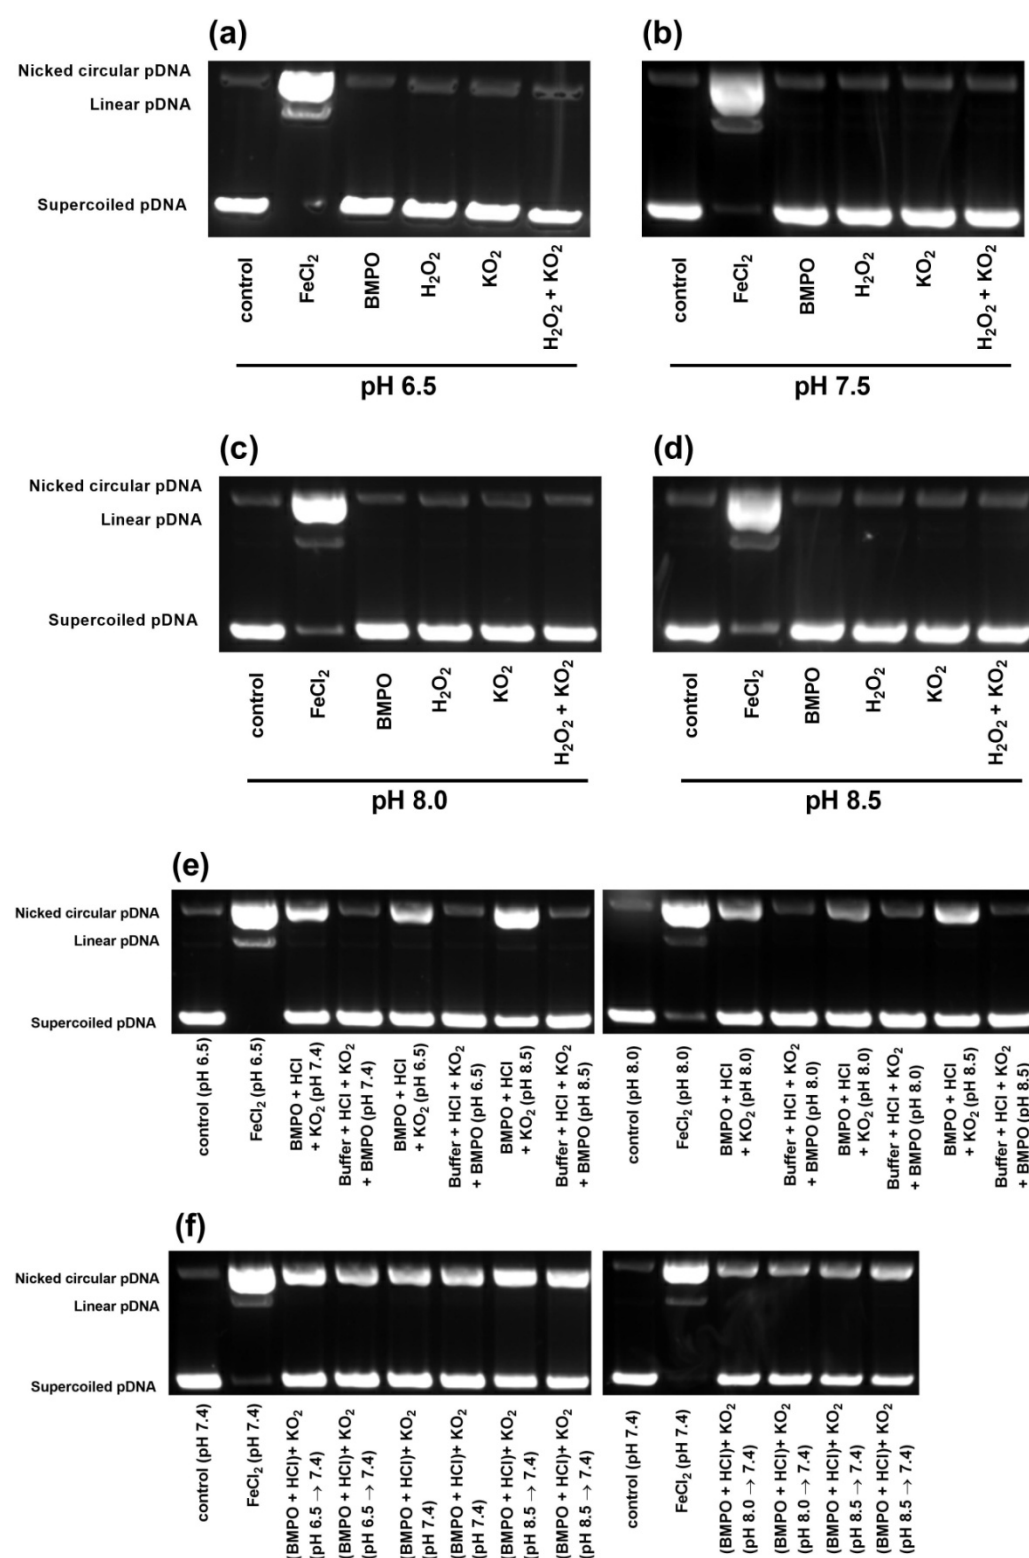

**Figure S2.** Representative gels indicating the effects of BMPO/KO<sub>2</sub> interaction on pDNA cleavage at various pH. Control samples containing: 5 mmol L<sup>-1</sup> BMPO, 5 mmol L<sup>-1</sup> H<sub>2</sub>O<sub>2</sub>, 10 mmol L<sup>-1</sup> KO<sub>2</sub> or a mixture of 5 mmol L<sup>-1</sup> H<sub>2</sub>O<sub>2</sub> with 10 mmol L<sup>-1</sup> KO<sub>2</sub> in 25 mmol L<sup>-1</sup> sodium phosphate (100 µmol L<sup>-1</sup>) at pH 6.5 (a), pH 7.4 (b), pH 8.0 (c) and pH 8.5 (d) are shown. The effect of 5/10 mmol L<sup>-1</sup> BMPO/KO<sub>2</sub> mixture at various pH (e) was measured in two modes: in the first one KO<sub>2</sub> was dissolved in pre-prepared (BMPO + HCl) solution or in the second one KO<sub>2</sub> was dissolved in (Buffer+HCl) and

10 seconds later BMPO was added. To compare the pDNA cleavage induced by 5/10 mmol L<sup>-1</sup> BMPO/KO<sub>2</sub> mixture at similar pH conditions (**f**), the sodium phosphate buffer pH 6.5, 8.0 or 8.5 was adjusted to pH 7.4. The strong cleavage induced by 150 µmol L<sup>-1</sup> FeCl<sub>2</sub> is shown for comparison. Final concentration of pDNA was 0.2 µg in 20 µL. The top bands on the gel correspond to the nicked circular form of pDNA. Besides single-stranded cleavage of the supercoiled pDNA generating the nicked circular form, double-stranded cleavage events creating linear form of pDNA were also observed even though only rarely. Principally, the linear form of pDNA can be generated from supercoiled circular form in two ways. As a consequence of random distribution of single-stranded nicks along the pDNA giving rise also to a situation when two nicks on the opposite DNA strands are localized in close vicinity, usually being ~ 10 to 20 bp apart. Such structure is thermodynamically unstable and causes local dissociation of pDNA strands and linearization of pDNA. In addition, for example as a result of action of Fe(II), binding of Fe(II) ion to pDNA backbone mediates multiple pDNA strand nicking events and this action linearizes pDNA. The bottom bands correspond to the (circular) supercoiled form of pDNA, and the less intense bands appearing above, in the case of FeCl<sub>2</sub>, represent the linear form of pDNA.
